# Supplementary material for: The impact of 27-hydroxycholesterol on endometrial cancer proliferation
Source: PubMed Central journal article supplement (PMC5847183; doi:10.1530/erc-17-0449), 2018-01-25

**A**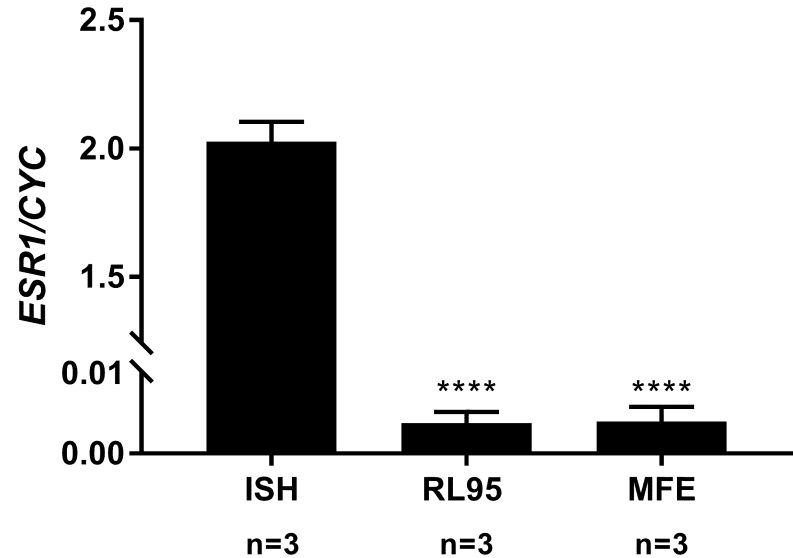**B**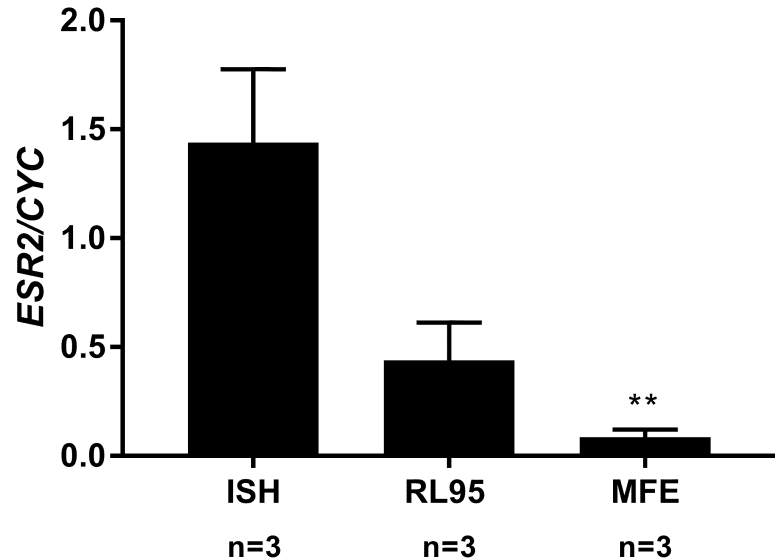

Supplement: erc-25-381-s004.pdf [file erc-25-381-s004.pdf]
