# Supplementary material for: The impact of 27-hydroxycholesterol on endometrial cancer proliferation
Source: PubMed Central journal article supplement (PMC5847183; doi:10.1530/erc-17-0449), 2018-01-25
Supplement: erc-25-381-s006.pdf [file erc-25-381-s006.pdf]

1 **Supplementary Figure 1. Expression of LXR in endometrial cancer.** The expression of LXR  
2 (antibody identified both isoforms) was assessed by immunohistochemistry in endometrial cancer  
3 tissue sections from well, moderate and poorly differentiated cancers. LXR was expressed throughout  
4 the tissue and localised to the nuclei of both stromal and epithelial cells (brown) in all cancer grades.  
5 Although staining was most intense in the nuclei, cytoplasmic staining was also detected possibly as a  
6 result of altered nuclear-cytoplasmic shuttling in cancer tissues. Cytoplasmic staining was not  
7 detected using immunofluorescence (Figure 2). Images representative of at least 3 different patients  
8 per cancer grade. Nuclear counterstain Haematoxylin (blue), scale bar 100µm.

9 **Supplementary Figure 2. Expression of ER $\alpha$  and the proliferation marker Ki67 in endometrial**  
10 **cancer.** The expression of ER $\alpha$  and the proliferation marker Ki67 was assessed by  
11 immunohistochemistry in endometrial cancer tissue sections. In well- and moderately-differentiated  
12 cancers (**1614, 871; 931, 739**), ER $\alpha$  was expressed throughout the tissue and localised to the nuclei of  
13 both stromal and epithelial cells (green staining). Nuclear immunoeexpression of Ki67 (red staining)  
14 was detected and co-localised with ER $\alpha$  expression although some Ki67-positive cells were ER $\alpha$ -  
15 negative. In poorly differentiated cancers (**910, 2178**), ER $\alpha$  was not detected but Ki67 was abundantly  
16 expressed. Images representative of at least 3 different patients per cancer grade, samples collected  
17 and processed as described in *Collins et al. BMC Cancer 2009, 9:330*. Nuclear counterstain DAPI  
18 (blue).

19 **Supplementary Figure 3. Endometrial epithelial cancer cells lines express both isoforms of LXR**  
20 **and enzymes required for regulation of 27HC.** Expression of LXR $\alpha$  (A) and LXR $\beta$  (B) protein was  
21 assessed by Western blot; mRNA expression of LXR isoforms; C *NR1H3* (LXR $\alpha$ ) and D *NR1H2*  
22 (LXR $\beta$ ) and the enzymes; E *CYP27A1* and F *CYP7B1* relative to internal control *CYC* was assessed  
23 by qPCR in endometrial cancer cell lines; Ishikawa (ISH; n=4-5), RL95 (n=2-4) and MFE280 (n=3-  
24 4), representative of well-, moderately- and poorly-differentiated cancer respectively. Western  
25 blotting was performed using 20µg/lane total cell lysates; membranes were probed with mouse anti-  
26 LXR $\alpha$  (Green, Predicted molecular weight: 50 kDa; abcam ab41902), mouse anti-LXR $\beta$  (Green,  
27 Predicted molecular weight: 50 kDa; Invitrogen 418400), loading control was goat anti-actin (Santa-

28 Cruz biotech sc-1616; predicted molecular weight 43kDa; red). Membranes were incubated with  
29 species-specific fluorescent-conjugated secondary antibodies and visualised using the Licor Odyssey  
30 system (Licor). \*\* $p < 0.01$ . Kruskal-Wallis test with multiple comparisons. Statistically significant  
31 comparison RL95 vs MFE280. All data are presented as mean  $\pm$  SEM.

32 **Supplementary Figure 4. Endometrial epithelial cancer cells lines express both ER isoforms.**

33 Expression mRNAs encoding ER isoforms; **A** *ESR1* ( $ER\alpha$ ) and **B** *ESR2* ( $ER\beta$ ) relative to internal  
34 control *CYC* was assessed by qPCR in endometrial cancer cell lines; Ishikawa (ISH;  $n=3$ ), RL95  
35 ( $n=3$ ) and MFE280 ( $n=3$ ), representative of well-, moderately- and poorly-differentiated cancer  
36 respectively. \*\* $p < 0.01$ , \*\*\*\*  $p < 0.0001$ . Kruskal-Wallis test with multiple comparisons. Statistical  
37 comparisons relative to Ishikawa (ISH). All data are presented as mean  $\pm$  SEM.

38 **Supplementary Figure 5. Endometrial epithelial cancer cells lines differentially express RXR**

39 **isoforms.** mRNA expression of RXR isoforms; **A** *NR2B1* ( $RXR\alpha$ ) and **B** *NR2B2* ( $RXR\beta$ ) and **C**  
40 *NR2B3* ( $RXR\gamma$ ) relative to internal control gene *CYC* was assessed by qPCR in endometrial cancer  
41 cell lines; Ishikawa (ISH;  $n=6$ ), RL95 ( $n=2$ ) and MFE280 ( $n=4$ ), representative of well-, moderately-  
42 and poorly-differentiated cancer respectively. All data are presented as mean  $\pm$  SEM.
