# Supplementary material for: The impact of 27-hydroxycholesterol on endometrial cancer proliferation
Source: PubMed Central journal article supplement (PMC5847183; doi:10.1530/erc-17-0449), 2018-01-25
Supplement: erc-25-381-t001.pdf [file erc-25-381-t001.pdf]

*Supplementary Table 1* - Patient characteristics

|                              | <b>Stage 1 Endometrial carcinoma grades</b> |                 |               |                |
|------------------------------|---------------------------------------------|-----------------|---------------|----------------|
|                              | <b>Well</b>                                 | <b>Moderate</b> | <b>Poor</b>   | <b>P value</b> |
| <b>Average age (+/- SEM)</b> | 63.6 +/- 2.13                               | 63.5 +/- 1.95   | 69.4 +/- 2.14 | 0.0706         |
| <b>Average BMI (+/- SEM)</b> | 31.3 +/- 2.58                               | 32.6 +/- 2.79   | 36.2 +/- 3.99 | 0.6442         |

*LMP* –last menstrual period, statistical comparison using *Kruskal-Wallis test*.
