# Supplementary material for: The impact of 27-hydroxycholesterol on endometrial cancer proliferation
Source: PubMed Central journal article supplement (PMC5847183; doi:10.1530/erc-17-0449), 2018-01-25
Supplement: erc-25-381-t002.pdf [file erc-25-381-t002.pdf]

*Supplementary Table 2* – Sample numbers for qPCR analysis

| <b>Gene<br/>Symbol</b> | <b>Well differentiated<br/>(G1)</b> | <b>Moderately differentiated<br/>(G2)</b> | <b>Poorly differentiated<br/>(G3)</b> |
|------------------------|-------------------------------------|-------------------------------------------|---------------------------------------|
| <i>NR1H3</i>           | 12                                  | 44                                        | 26                                    |
| <i>NR1H2</i>           | 30                                  | 64                                        | 24                                    |
| <i>CYP7B1</i>          | 19                                  | 54                                        | 32                                    |
| <i>CYP27A1</i>         | 19                                  | 54                                        | 32                                    |
