# Supplementary material for: The impact of 27-hydroxycholesterol on endometrial cancer proliferation
Source: PubMed Central journal article supplement (PMC5847183; doi:10.1530/erc-17-0449), 2018-01-25
Supplement: erc-25-381-t003.pdf [file erc-25-381-t003.pdf]

*Supplementary Table 3* - Primers and probes for qRT-PCR.

| <b>Gene Symbol</b> | <b>5' to 3'</b>               | <b>3' to 5'</b>               | <b>UPL probe</b> |
|--------------------|-------------------------------|-------------------------------|------------------|
| <i>NR1H3</i>       | <i>catcctcttctcccagcaag</i>   | <i>cattaccaaggcactgtcca</i>   | 49               |
| <i>NR1H2</i>       | <i>ttcacctacagcaaggacga</i>   | <i>gaactcgaagatggggttga</i>   | 39               |
| <i>CYP7B1</i>      | <i>ccccttaaggttcatgaaaaca</i> | <i>tggaaggggtccaggataa</i>    | 79               |
| <i>CYP27A1</i>     | <i>ggctggagtggacacgac</i>     | <i>accacaccaccacttct</i>      | 31               |
| <i>ESR1</i>        | <i>aaccagtgcaccattgataaaa</i> | <i>tctcttcgggtctttctgatac</i> | 69               |
| <i>ESR2</i>        | <i>gctcctgtcccacgtcag</i>     | <i>tgggcattcagcatctcc</i>     | 62               |
| <i>NR2B1</i>       | <i>acatgcagatggacaagacg</i>   | <i>tcgagagccccttgaggt</i>     | 26               |
| <i>NR2B2</i>       | <i>agctccccaggattctc</i>      | <i>ccagggagtgacactgttgag</i>  | 66               |
| <i>NR2B3</i>       | <i>cctgcgagccattgtactct</i>   | <i>aagggtggcataaaccttctc</i>  | 39               |
