# Supplementary material for: The impact of 27-hydroxycholesterol on endometrial cancer proliferation
Source: PubMed Central journal article supplement (PMC5847183; doi:10.1530/erc-17-0449), 2018-01-25
Supplement: erc-25-381-t004.pdf [file erc-25-381-t004.pdf]

*Supplementary Table 4 – antibodies used in Immunohistochemistry and Western blot (WB) analysis*

| <b>Antibody name</b>               | <b>Species raised</b> | <b>Supplier</b> | <b>Cat No</b> | <b>Dilution</b>       |
|------------------------------------|-----------------------|-----------------|---------------|-----------------------|
| LXR $\alpha/\beta$ Antibody (G-10) | Mouse monoclonal      | Santa Cruz bt   | sc-271064     | 1:530 (DAB)<br>1:1400 |
| Estrogen receptor alpha            | Mouse monoclonal      | Vector          | VP-614        | 1:20                  |
| Ki67                               | Rabbit polyclonal     | Abcam           | Ab15580       | 1:2000                |
| LXR $\alpha$ (WB)                  | Mouse monoclonal      | Abcam           | ab41902       | 1:1000                |
| LXR $\beta$ (WB)                   | Mouse monoclonal      | Invitrogen      | 418400        | 1:500                 |
| ACTIN (I-19) (WB)                  | Goat polyclonal       | Santa Cruz bt   | sc-1616       | 1:500                 |
